# Supplementary material for: Sociodemographic and Health Indicators of Diet Quality in Pre-Frail Older Adults in New Zealand
Source: MDPI journal article supplement (doi:10.3390/nu15204416), 2023-10-18
Supplement: s1 [file s1]

# Sociodemographic and Health Indicators of Diet Quality in Pre-Frail Older Adults in New Zealand

Esther Tay <sup>1</sup>, Daniel Barnett <sup>2</sup>, Maisie Rowland <sup>3</sup>, Ngaire Kerse <sup>1</sup>, Richard Edlin <sup>4</sup>,  
Debra L. Waters <sup>5,6,7</sup>, Martin Connolly <sup>8</sup>, Avinesh Pillai <sup>2</sup>, Evelingi Tupou <sup>1</sup> and Ruth Teh <sup>1,\*</sup>

## Supplementary Material

### Materials and Methods

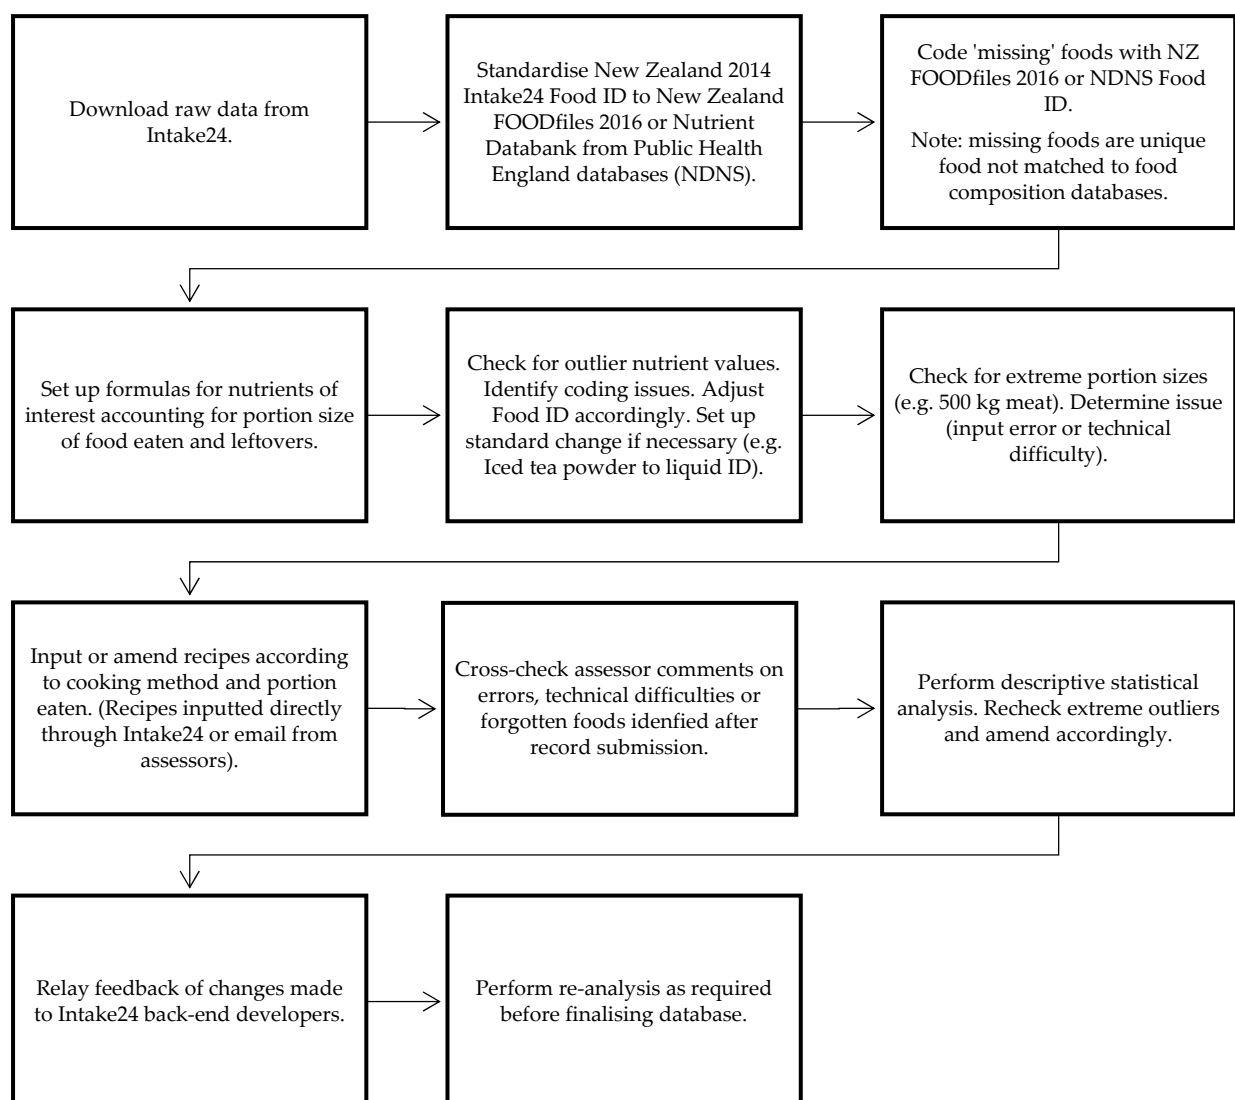

**Figure S1** Summary of systems and changes implemented for cleaning Intake24 data.

**Table S1.** Multivariate regression against DQI-I score and subcomponents for Low Energy Reporter (LER) only.

| Demographic and health variables                 | B      | 95% Wald CI    | <i>p</i> -value |
|--------------------------------------------------|--------|----------------|-----------------|
| <b>DQI-I total score</b>                         |        |                |                 |
| (Intercept)                                      | 58.567 | 52.248, 64.887 | <0.001          |
| Live alone; (reference: with others)             | 2.480  | -0.300, 5.260  | 0.080           |
| Alcohol consumption (never; reference: regular)  | -2.382 | -5.921, 1.156  | 0.187           |
| (Occasional; reference: regular)                 | 0.680  | -2.404, 3.764  | 0.666           |
| Vision (impaired; reference: non impaired)       | -3.890 | -9.254, 1.474  | 0.155           |
| Deprivation (low; reference: high)               | 2.436  | -1.027, 5.898  | 0.168           |
| (Medium; reference: high)                        | 2.125  | -1.208, 5.457  | 0.211           |
| (Scale)                                          | 68.016 | 54.281, 85.226 |                 |
| <b>Variety score</b>                             |        |                |                 |
| (Intercept)                                      | 7.743  | 3.259, 12.227  | <0.001          |
| Live alone; (reference: with others)             | 0.987  | -0.086, 2.059  | 0.071           |
| Waist circumference, cm                          | 0.027  | -0.015, 0.069  | 0.207           |
| GDS score (no depression; reference: depression) | 0.894  | -0.473, 2.261  | 0.200           |
| (Scale)                                          | 10.709 | 8.533, 13.438  |                 |
| <b>Adequacy score</b>                            |        |                |                 |
| (Intercept)                                      | 16.864 | 10.581, 23.147 | <0.001          |
| Deprivation (low; reference: high)               | 1.499  | -0.344, 3.341  | 0.111           |
| (Medium; reference: high)                        | 2.489  | 0.689, 4.289   | 0.007           |
| Waist circumference, cm                          | 0.083  | 0.025, 0.141   | 0.005           |
| Alcohol consumption (never; reference: regular)  | -0.920 | -2.854, 1.014  | 0.351           |
| (Occasional; reference: regular)                 | 0.022  | -1.626, 1.669  | 0.979           |
| (Scale)                                          | 19.614 | 15.630, 24.615 |                 |
| <b>Moderation score</b>                          |        |                |                 |
| (Intercept)                                      | 20.251 | 16.143, 24.359 | <0.001          |
| Sex (male; reference: female)                    | -1.777 | -3.135, -0.419 | 0.010           |
| BMI, kg/m <sup>2</sup>                           | -0.177 | -0.303, -0.051 | 0.006           |
| Live alone; (reference: with others)             | 0.602  | -0.762, 1.966  | 0.387           |
| (Scale)                                          | 15.798 | 12.598, 19.810 |                 |
| <b>Balance score</b>                             |        |                |                 |
| (Intercept)                                      | 5.391  | 3.779, 7.004   | <0.001          |
| Supplements (0; reference: 1+)                   | 0.514  | 0.028, 1.000   | 0.038           |
| BMI, kg/m <sup>2</sup>                           | -0.031 | -0.078, 0.016  | 0.189           |
| Sex (male; reference: female)                    | 0.401  | -0.087, 0.889  | 0.107           |
| Education level (primary; reference: tertiary)   | -0.989 | -2.500, 0.522  | 0.199           |
| (Secondary; reference: tertiary)                 | -0.097 | -0.584, 0.391  | 0.698           |
| (Scale)                                          | 2.188  | 1.745, 2.744   |                 |

Italicized *p*-values are significant at the 0.05 level.

**Table S2.** Multivariate regression against DQI-I score and subcomponents for plausible reporters only.

| Demographic and health variables                 | B      | 95% Wald CI    | <i>p</i> -value |
|--------------------------------------------------|--------|----------------|-----------------|
| <b>DQI-I total score</b>                         |        |                |                 |
| (Intercept)                                      | 59.995 | 51.618, 68.372 | <0.001          |
| Ethnic group (European; reference: non-European) | 3.034  | 0.016, 6.052   | 0.049           |
| Waist circumference, cm                          | -0.039 | -0.113, 0.035  | 0.299           |
| Live alone; (reference: with others)             | 0.807  | -0.936, 2.550  | 0.364           |
| Deprivation (low; reference: high)               | 1.443  | -0.695, 3.581  | 0.186           |
| (Medium; reference: high)                        | 0.893  | -1.330, 3.116  | 0.431           |
| (Scale)                                          | 59.223 | 50.634, 69.267 |                 |
| <b>Variety score</b>                             |        |                |                 |
| (Intercept)                                      | 13.526 | 12.693, 14.360 | <0.001          |
| Medications (1; reference: 2+)                   | 1.191  | -0.024, 2.406  | 0.055           |
| Sex (male; reference: female)                    | 0.491  | -0.192, 1.173  | 0.159           |
| Deprivation (low; reference: high)               | 0.624  | -0.190, 1.437  | 0.133           |
| (Medium; reference: high)                        | 0.751  | -0.094, 1.596  | 0.082           |
| Alcohol consumption (never; reference: regular)  | -0.682 | -1.557, 0.193  | 0.127           |
| (Occasional; reference: regular)                 | -0.278 | -1.041, 0.486  | 0.476           |
| (Scale)                                          | 8.812  | 7.534, 10.306  |                 |
| <b>Adequacy score</b>                            |        |                |                 |
| (Intercept)                                      | 21.257 | 16.126, 26.387 | <0.001          |
| Ethnic group (European; reference: non-European) | 2.088  | 0.724, 3.453   | 0.003           |
| Smoking (non-smoker; reference: smoker)          | 4.062  | 0.457, 7.666   | 0.027           |
| Education level (primary; reference: tertiary)   | -1.833 | -4.165, 0.499  | 0.123           |
| (Secondary; reference: tertiary)                 | 0.079  | -0.750, 0.908  | 0.851           |
| NEADL score                                      | 0.161  | -0.026, 0.348  | 0.091           |
| (Scale)                                          | 13.025 | 11.136, 16.234 |                 |
| <b>Moderation score</b>                          |        |                |                 |
| (Intercept)                                      | 14.275 | 8.80, 19.744   | <0.001          |
| Live alone; (reference: with others)             | 0.927  | 0.031, 1.823   | 0.043           |
| Age, (<80 years; reference: 80+ years)           | -0.452 | -1.356, 0.452  | 0.327           |
| MoCA score (not impaired; reference: impaired)   | 0.778  | -0.244, 1.799  | 0.136           |
| Waist circumference, cm                          | -0.048 | -0.084, -0.012 | 0.010           |
| NEADL score                                      | 0.047  | -0.156, 0.250  | 0.647           |
| (Scale)                                          | 14.938 | 12.771, 17.471 |                 |
| <b>Balance score</b>                             |        |                |                 |
| (Intercept)                                      | 4.652  | 4.259, 5.046   | <0.001          |
| Alcohol consumption (never; reference: regular)  | 0.674  | 0.256, 1.092   | 0.002           |
| (Occasional; reference: regular)                 | 0.373  | 0.011, 0.734   | 0.043           |
| MoCA score (not impaired; reference: impaired)   | -0.590 | -0.966, -0.214 | 0.002           |
| (Scale)                                          | 2.040  | 1.744, 2.386   |                 |

Italicized *p*-values are significant at the 0.05 level.

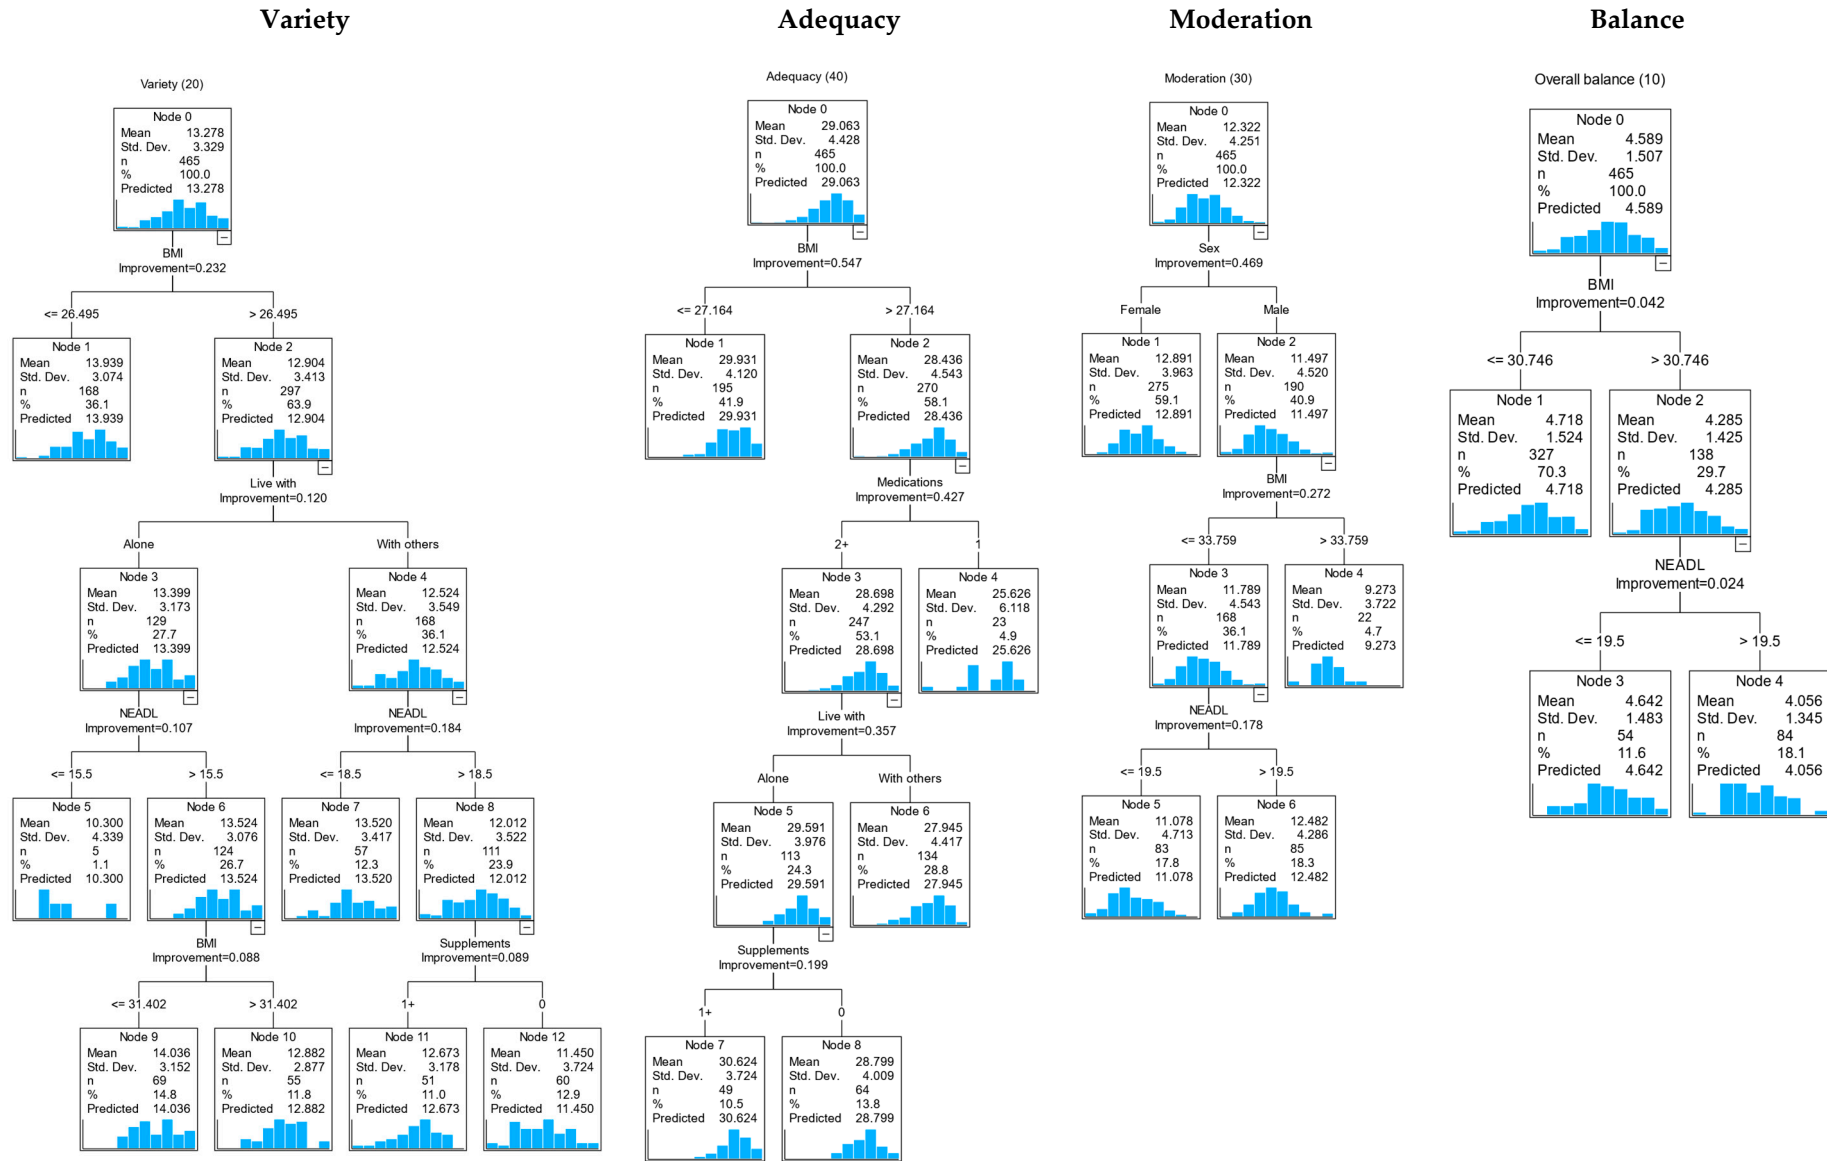

Figure S2. CART diagram of factors associated with DQI-I subcomponents in pre-frail older adults

Plausible reporters only

Total DQI-I

Total DQI-I (/100)

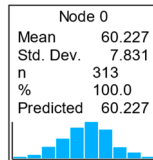

Variety

Variety (20)

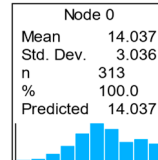

Adequacy

Adequacy (40)

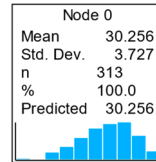

Moderation

Moderation (30)

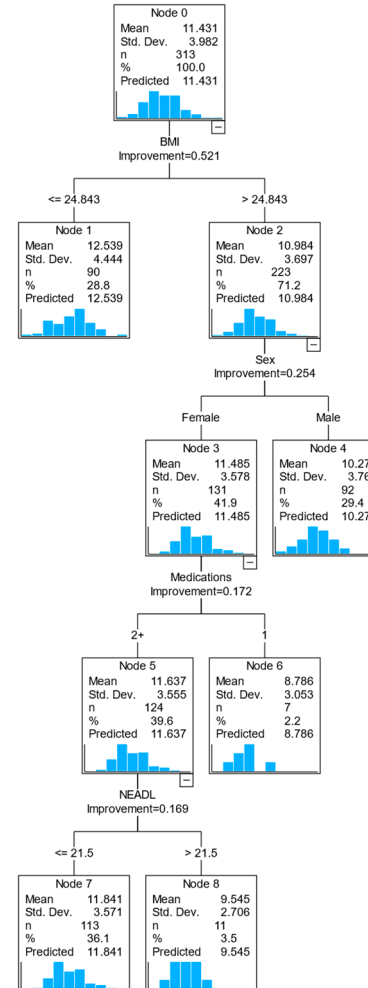

Balance

Overall balance (10)

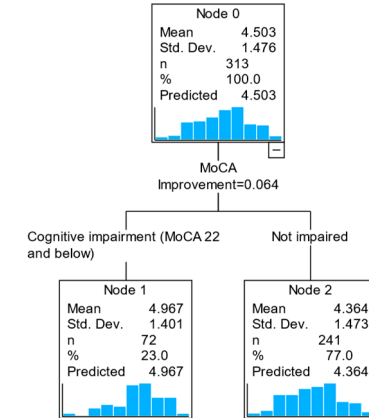

Figure S3. CART diagram of factors associated with DQI-I and subcomponents in pre-frail older adults for plausible reporter (PR) only.

## Low Energy Reporters only

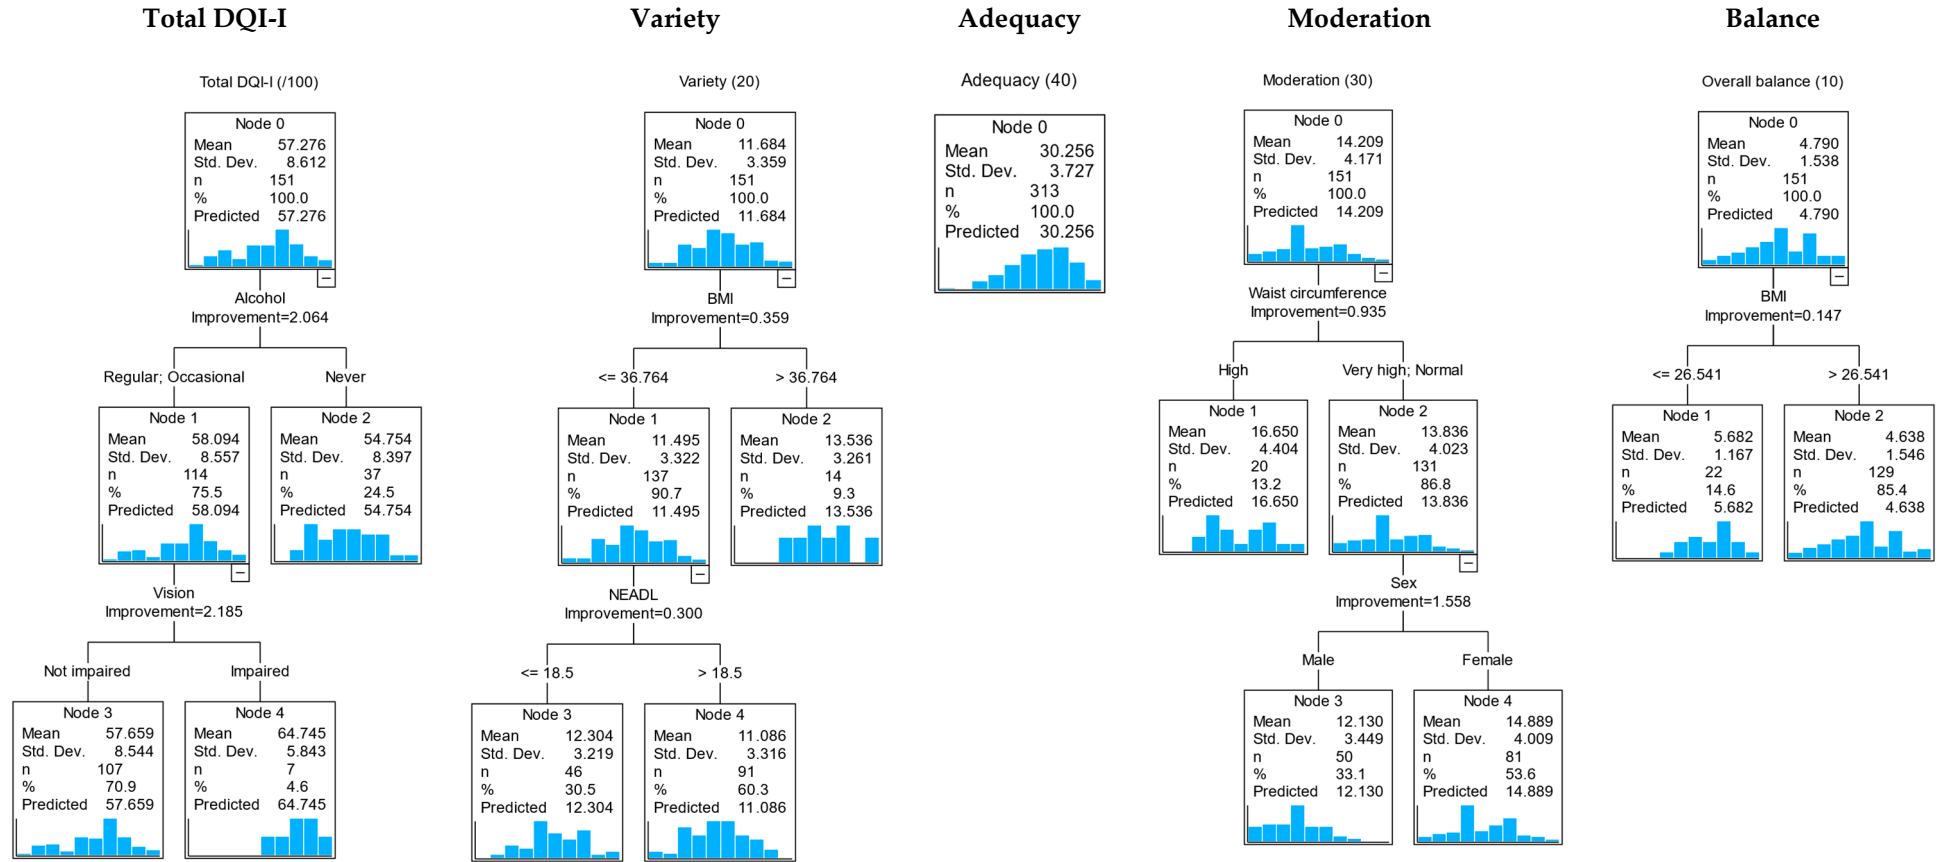

**Figure S4.** CART diagram of factors associated with DQI-I and subcomponents in pre-frail older adults for LER only.
